# Supplementary material for: A novel gene-diet pair modulates C. elegans aging
Source: PubMed Central journal article supplement (PMC6117094; doi:10.1371/journal.pgen.1007608), 2018-08-20
Supplement: pgen.1007608.s007.pdf [file pgen.1007608.s007.pdf]

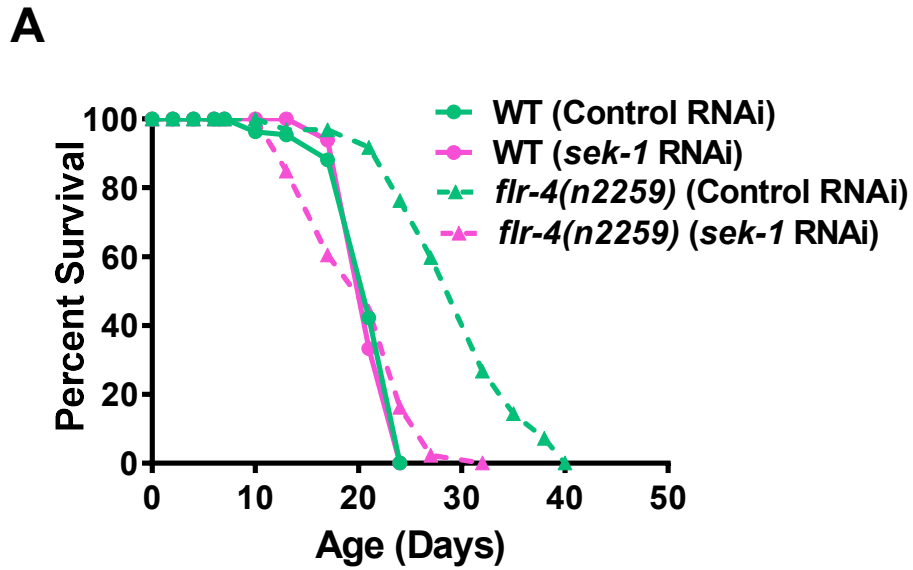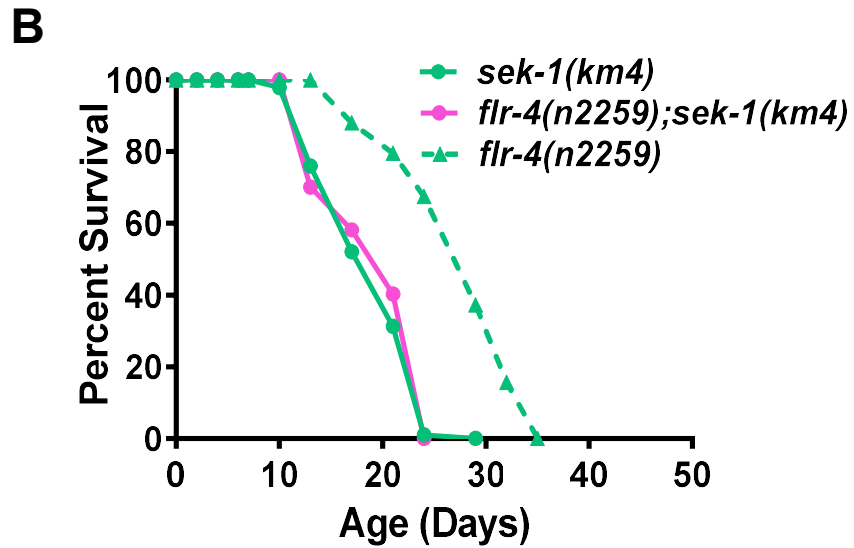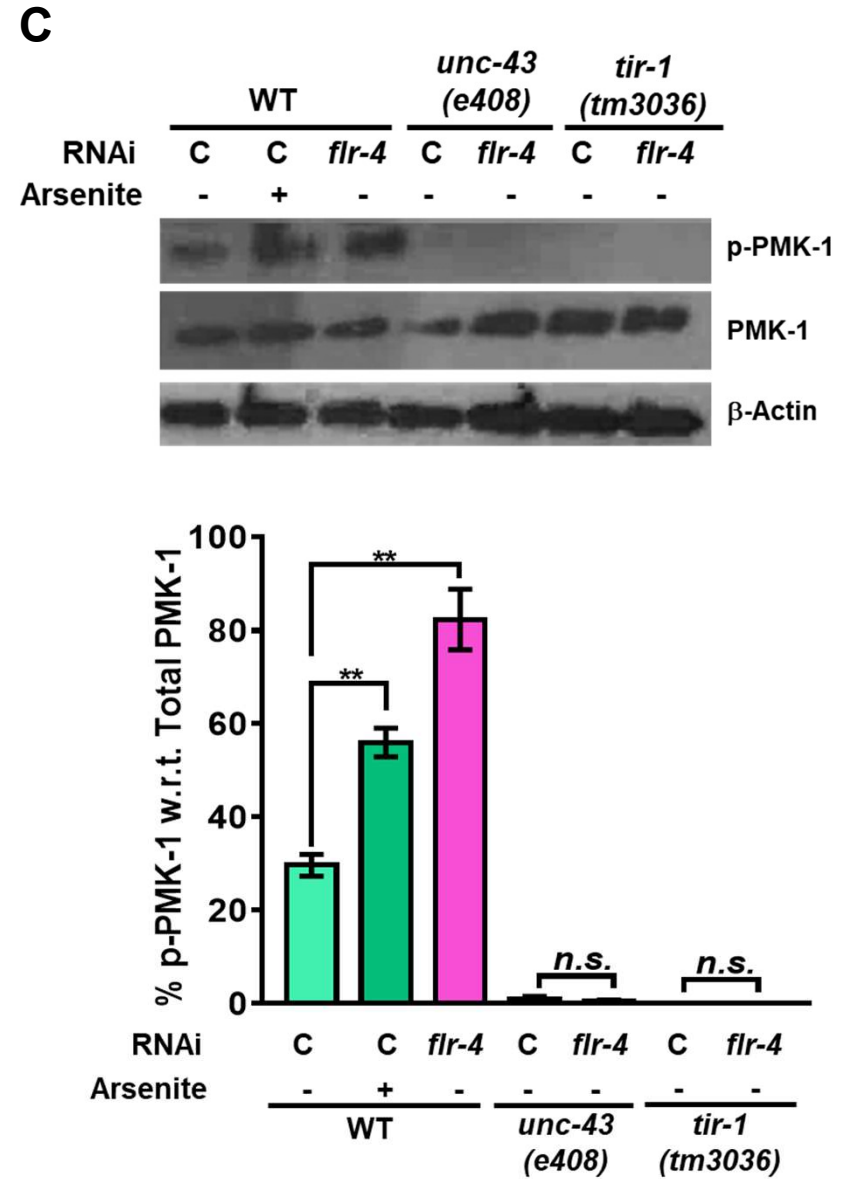

Figure S7
