# Supplementary material for: A novel gene-diet pair modulates C. elegans aging
Source: PubMed Central journal article supplement (PMC6117094; doi:10.1371/journal.pgen.1007608), 2018-08-20

**A**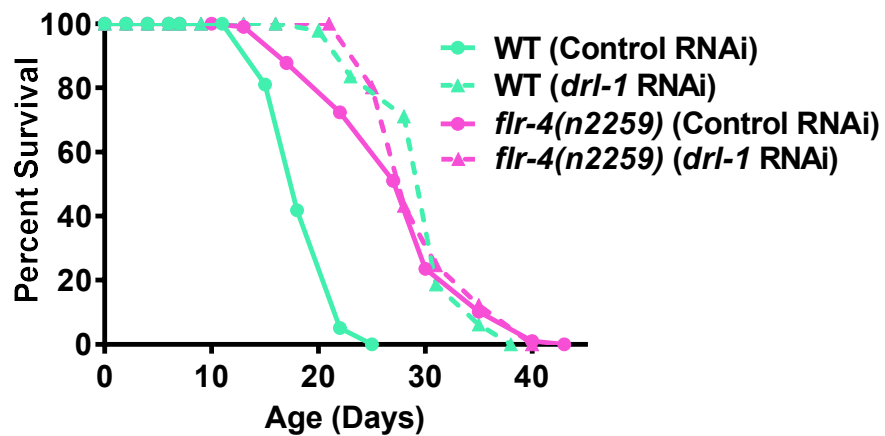**B**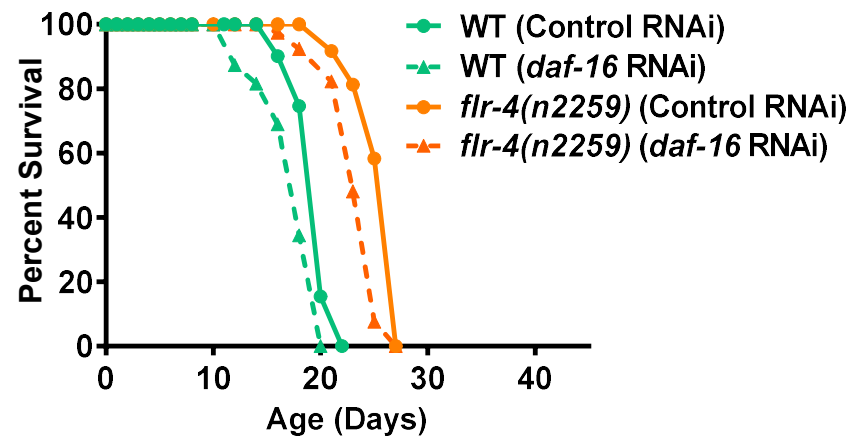**C**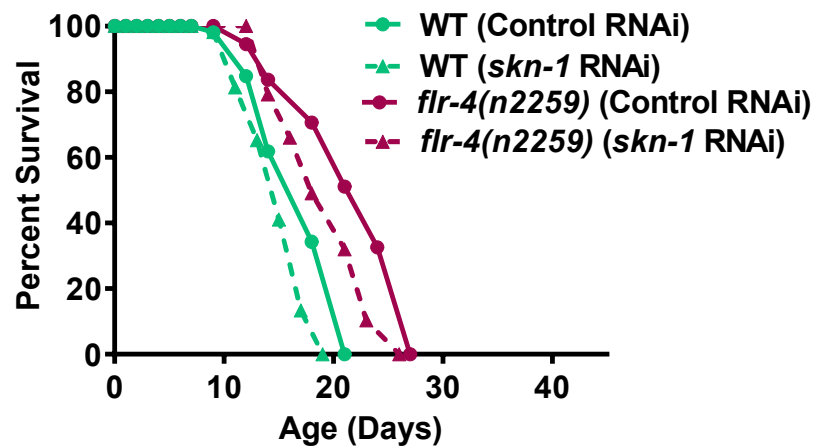**D**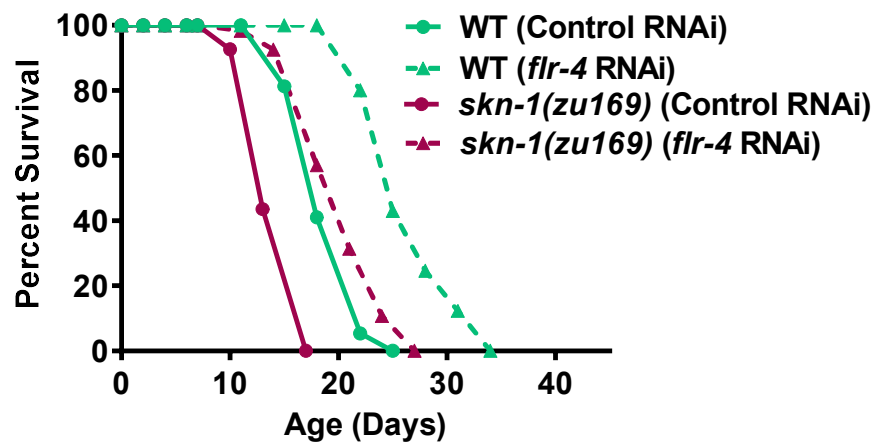

Supplement: pgen.1007608.s010.pdf [file pgen.1007608.s010.pdf]
